# Supplementary material
Source: ML conference proceedings conference paper supplement (https://openreview.net/forum?id=j6PTT6NB2O)
Supplement: supplementary_material [file attachment]

---

# Stress-Testing Long-Context Language Models with Lifelong ICL and Task Haystack

---

## Supplementary Material - Case Studies

### 1 Executive Summary

As introduced in the main paper, Task Haystack inherits the controllability benefits of the original needle-in-a-haystack test [Kamradt, 2023]. It facilitates easy aggregation of results by permutations, context depth, and task, enabling the creation of visualized reports to help identify the vulnerabilities of long-context LMs.

In this file, we provide visualizations of 6 sets of experiments discussed in the main paper and summarize our main findings. The experiment settings include:

- Fig. 2: Mistral-7B (32k), N-Task=16, N-Shot=8.
- Fig. 3: FILM-7B (32k), N-Task=16, N-Shot=8.
- Fig. 4: GPT-3.5-Turbo (16k), N-Task=16, N-Shot=4.
- Fig. 5: GPT-4o (128k), N-Task=16, N-Shot=8.
- Fig. 6: Mistral-7B (32k), N-Task=32, N-Shot=2.
- Fig. 7: Mistral-7B (32k), N-Task=64, N-Shot=2.

### How to interpret the diagnostic report?

- The main body of the diagnostic report is an  $n \times n$  matrix, where  $n$  is the number of tasks used in the experiments. The x-axis represents the task index in the Lifelong ICL stream of all tasks, while the y-axis represents the tasks themselves. If the cell at (insincere questions, index 5) is colored red, it indicates that the task of insincere questions appears at index 5 in one of the five permutations, and the performance when using the Lifelong ICL prompt is significantly worse than when using the single-task ICL prompt, resulting in a test failure in Task Haystack. White suggests no significant differences, and blue suggests that Lifelong ICL outperforms Single-task ICL. Since we run five permutations of tasks in our experiments, the figure is only sparsely colored. A grey cell means “N/A” and indicates that the task does not appear at a specific index in the five permutations.
- Below the main matrix, we plot the results by the five permutations we created. If the cell at (permutation 1, index 5) is colored red, it indicates that the task at index 5 in permutation 1 failed the Task Haystack test.
- We average each column and each row in the main  $n \times n$  matrix to aggregate performance by task and by index, and visualize them at the right or the bottom of the report. This helps to investigate which tasks are more likely to fail (or excel) and to understand which positions in the context window are more vulnerable.

### 33 Main Findings.

- 34 • **Failing (forgetting) and excelling (positive transfer) are highly task-dependent.** In  
35 Fig. 1 we plot the distribution of task-specific failure/excel rates in the experiments of  
36 Mistral-7B (32k), N-Task=64, N-Shot=2. “Fail (5/5)” achieves the second highest frequency,  
37 suggesting that these tasks are inherently more “forgettable” in the Lifelong ICL setting,  
38 and the performance on these tasks drops significantly regardless of their index in the  
39 context. Similarly, the bars of Excel 3/5, 4/5, 5/5 have higher frequencies than Excel 1/5,  
40 2/5, suggesting that certain tasks are inherently more likely to benefit positive transfer from  
41 other tasks.
- 42 • **Different models demonstrate different patterns.** In Table 1, we list the names of tasks  
43 that always fail (*i.e.*, fail in 5 out of the 5 task permutations) and the names of tasks that  
44 often excel (*i.e.*, excel in more than 3 out of 5 permutations). We show that there is little  
45 consistency across different models being investigated. For example, the task `brag_action`  
46 often excels with Mistral-7B (32k) but always fails with FILM-7B (32k) and GPT-3.5-Turbo  
47 (16k). Similarly, the task `insincere_questions` also appear in both categories for different  
48 models. Our hypothesis is that the compared models may have been trained on the tasks  
49 we use, and hence their forgetting and transfer behavior is influenced. Due to the lack of  
50 transparency regarding the training details of these models, we cannot further investigate this  
51 hypothesis. However, we encourage future model developers to examine data contamination  
52 and interpret the diagnostic report in conjunction with the data contamination situation.

Table 1: **Notable Tasks By investigating Task Haystack Results.** We select tasks that always fail for a model (*i.e.*, fail in 5 out of the 5 permutations) and tasks that often excel (*i.e.*, excel in more than 3 out of 5 permutations).

| Model               | N-Task | N-Shot | Tasks that always fail (=5/5)                                                                           | Tasks that often excel (>3/5)                                                                              |
|---------------------|--------|--------|---------------------------------------------------------------------------------------------------------|------------------------------------------------------------------------------------------------------------|
| Mistral-7B (32k)    | 16     | 8      | <code>insincere_questions</code><br><code>news_data</code>                                              | <code>brag_action</code><br><code>wiki_qa</code>                                                           |
| FILM-7B (32k)       | 16     | 8      | <code>brag_action</code><br><code>emo</code><br><code>insincere_questions</code>                        | <code>pun_detection</code>                                                                                 |
| GPT-3.5-Turbo (16k) | 16     | 4      | <code>amazon_counterfactual_en</code><br><code>brag_action</code><br><code>this_is_not_a_dataset</code> | -                                                                                                          |
| GPT-4o (128k)       | 16     | 8      | -                                                                                                       | <code>covid_fake_news</code><br><code>insincere_questions</code><br><code>logical_fallacy_detection</code> |

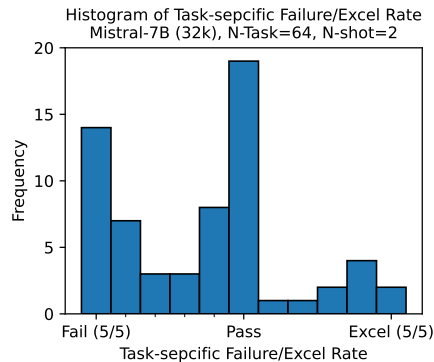

Figure 1: **Histogram Failure/Excel Rate Aggregated by Task.** We aggregate the results of Mistral-7B (32k), N-Task=64, N-Shot=2 (Fig. 7).

## 53 2 Diagnostic Reports

### 54 2.1 Mistral-7B, N-task=16, N-shot=8

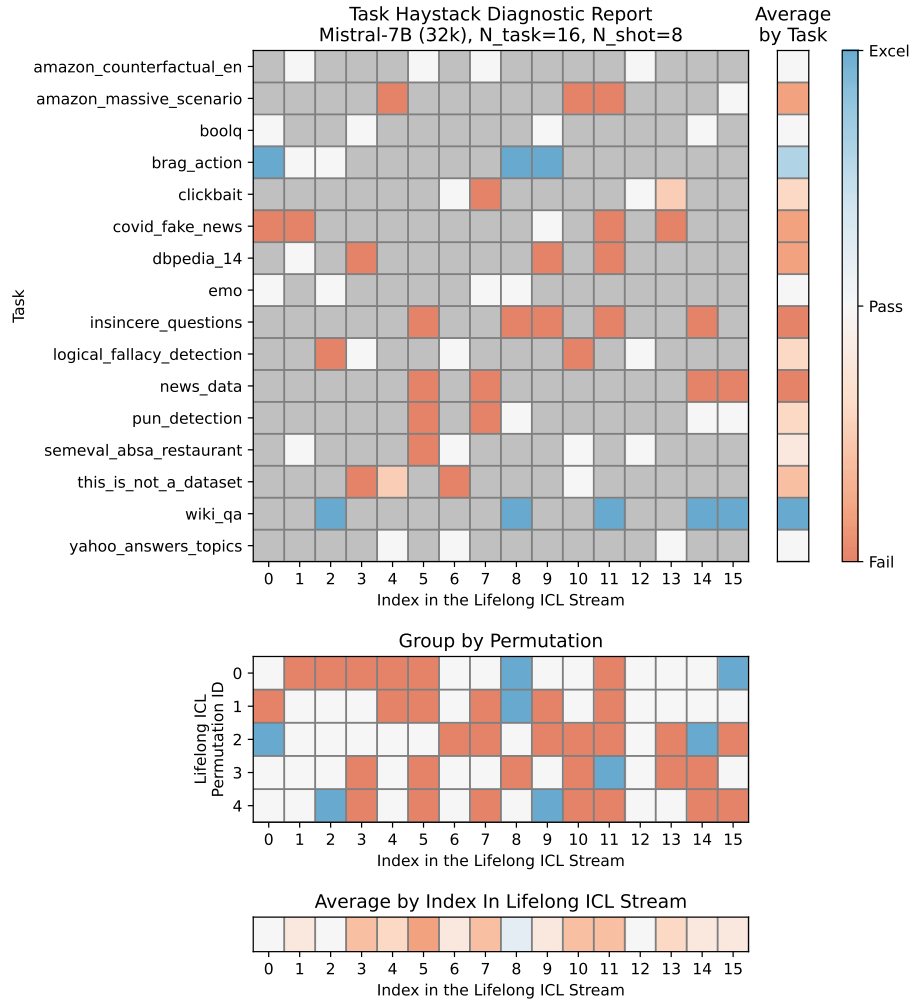

Figure 2: Diagnostic Report on Mistral-7B (32k), N-task=16, N-shot=8.

55 **2.2 FILM-7B, N-task=16, N-shot=8**

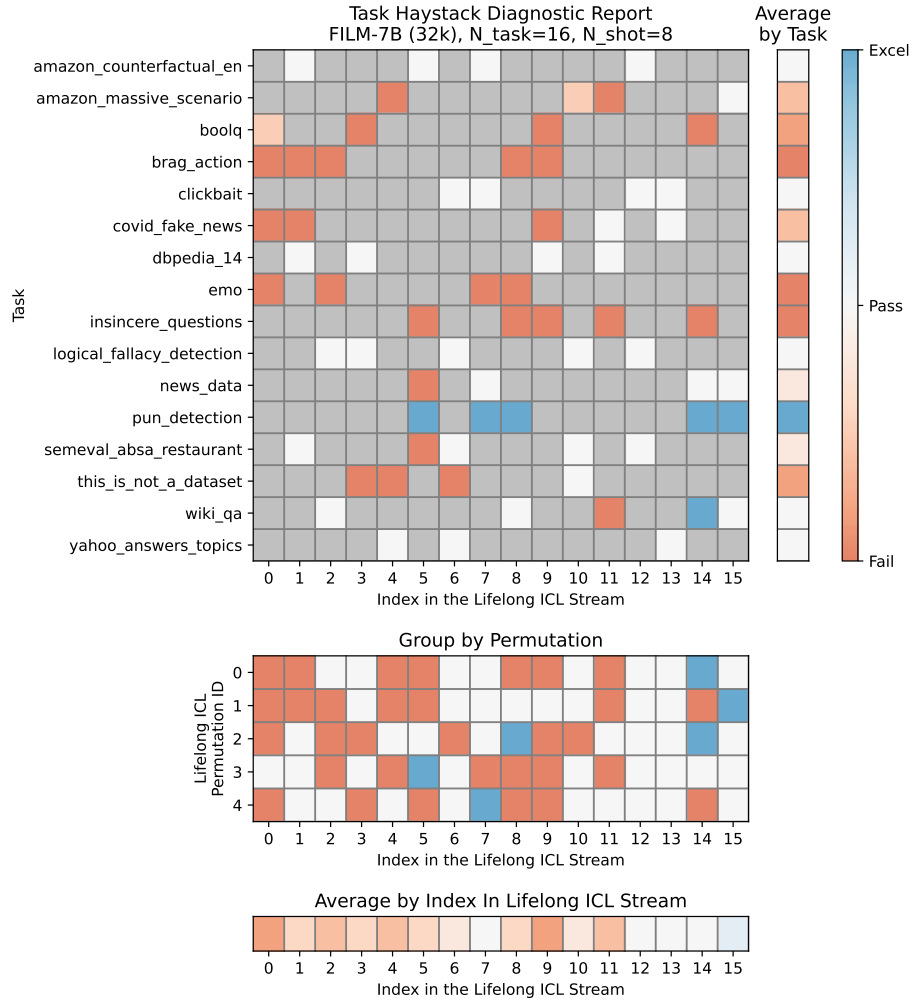

Figure 3: Diagnostic Report on FILM-7B (32k), N-task=16, N-shot=8.

56 **2.3 GPT-3.5-turbo, N-task=16, N-shot=4**

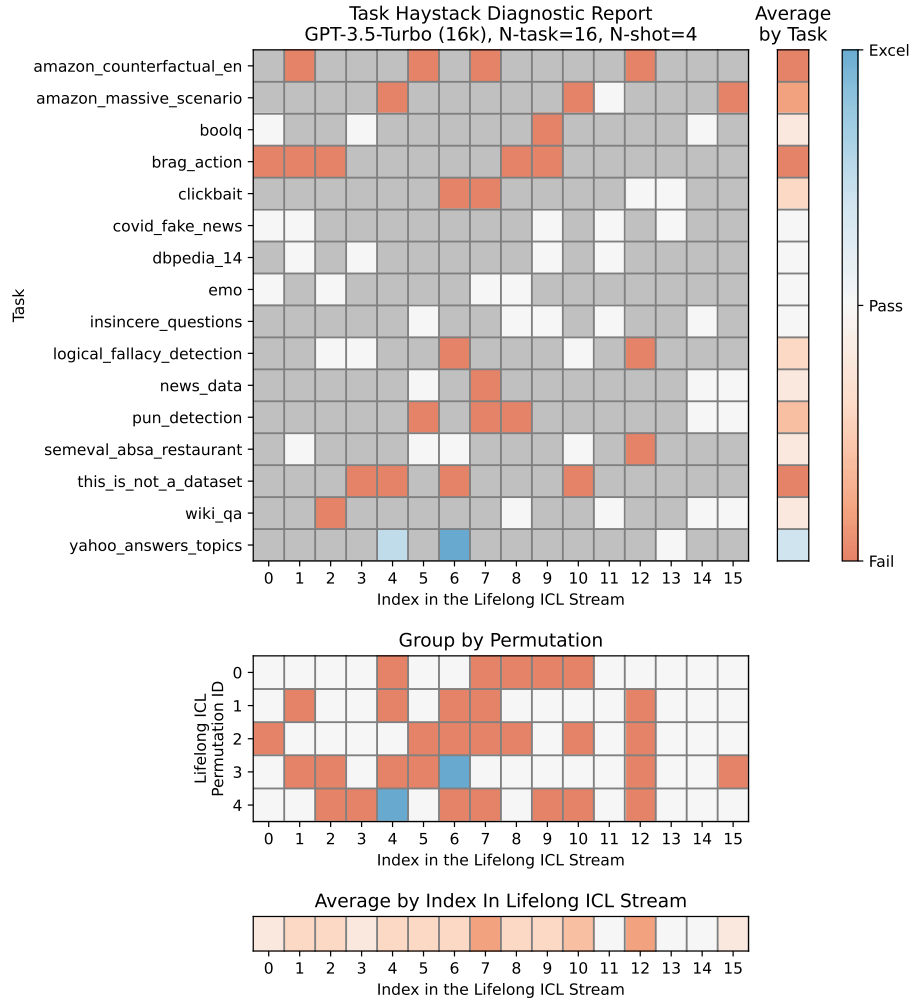

Figure 4: Diagnostic Report on GPT-3.5-Turbo (16k), N-task=16, N-shot=4.

57 **2.4 GPT-4o, N-task=16, N-shot=8**

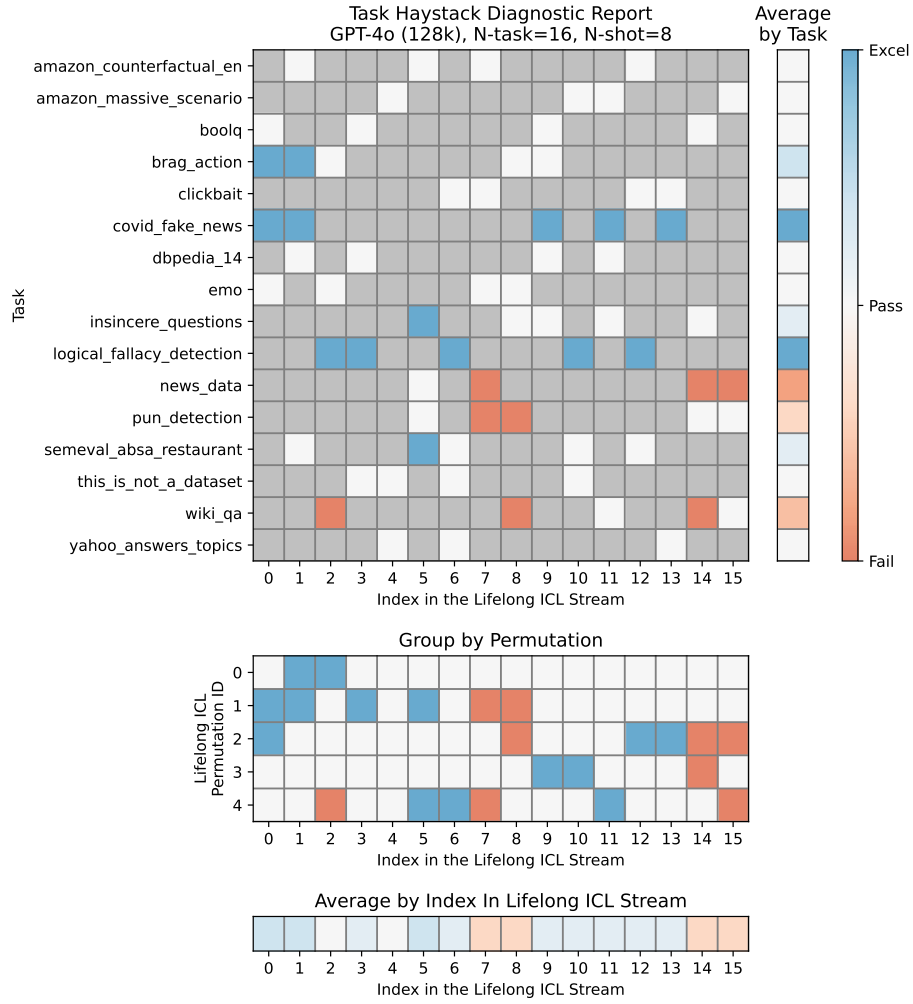

Figure 5: Diagnostic Report on GPT-4o (128k), N-task=16, N-shot=8.

58 **2.5 Mistral-7B, 32-task, 4-shot**

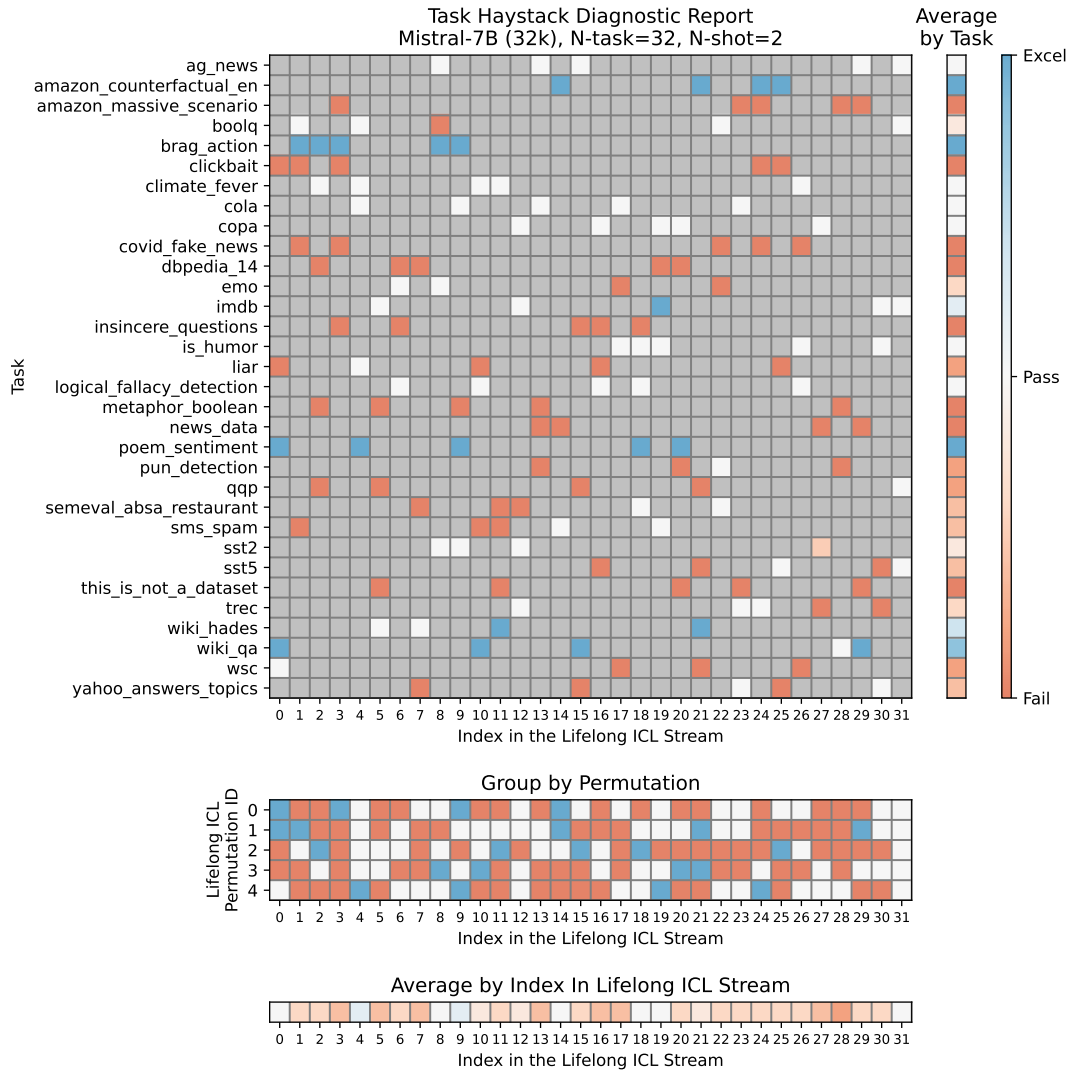

Figure 6: Diagnostic Report on Mistral-7B (32k), N-task=32, N-shot=2.

## 59 2.6 Mistral-7B, 64-task, 4-shot

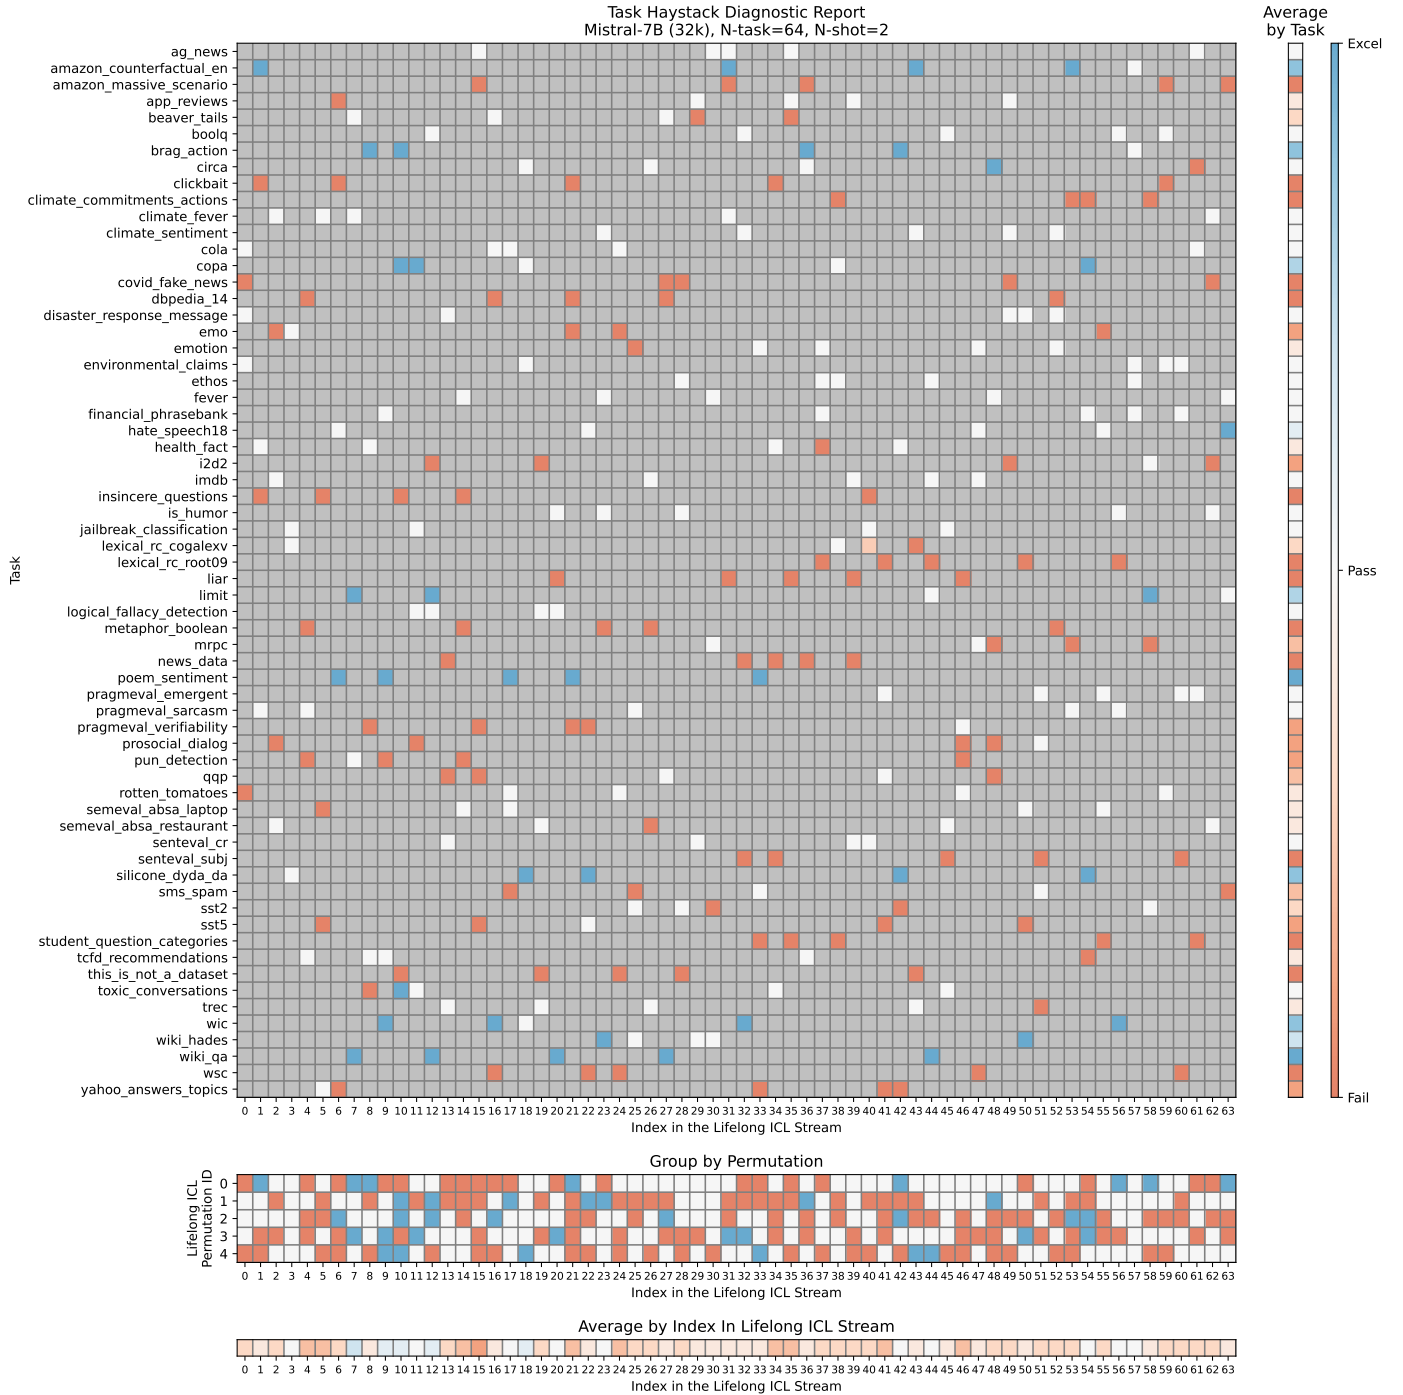

Figure 7: Diagnostic Report on Mistral-7B (32k), N-task=64, N-shot=2.

## 60 References

- 61 Gregory Kamradt. Needle in a haystack - pressure testing llms. [https://github.com/gkamradt/](https://github.com/gkamradt/LLMTest_NeedleInAHaystack/tree/main)  
62 [LLMTest\\_NeedleInAHaystack/tree/main](https://github.com/gkamradt/LLMTest_NeedleInAHaystack/tree/main), 2023.
